# Supplementary material for: A Conserved TCRβ Signature Dominates a Highly Polyclonal T-Cell Expansion During the Acute Phase of a Murine Malaria Infection
Source: PubMed Central journal article supplement (PMC7719809; doi:10.3389/fimmu.2020.587756), 2020-11-23
Supplement: Image_1.pdf [file Image_1.pdf]

# Supplementary Figure 1

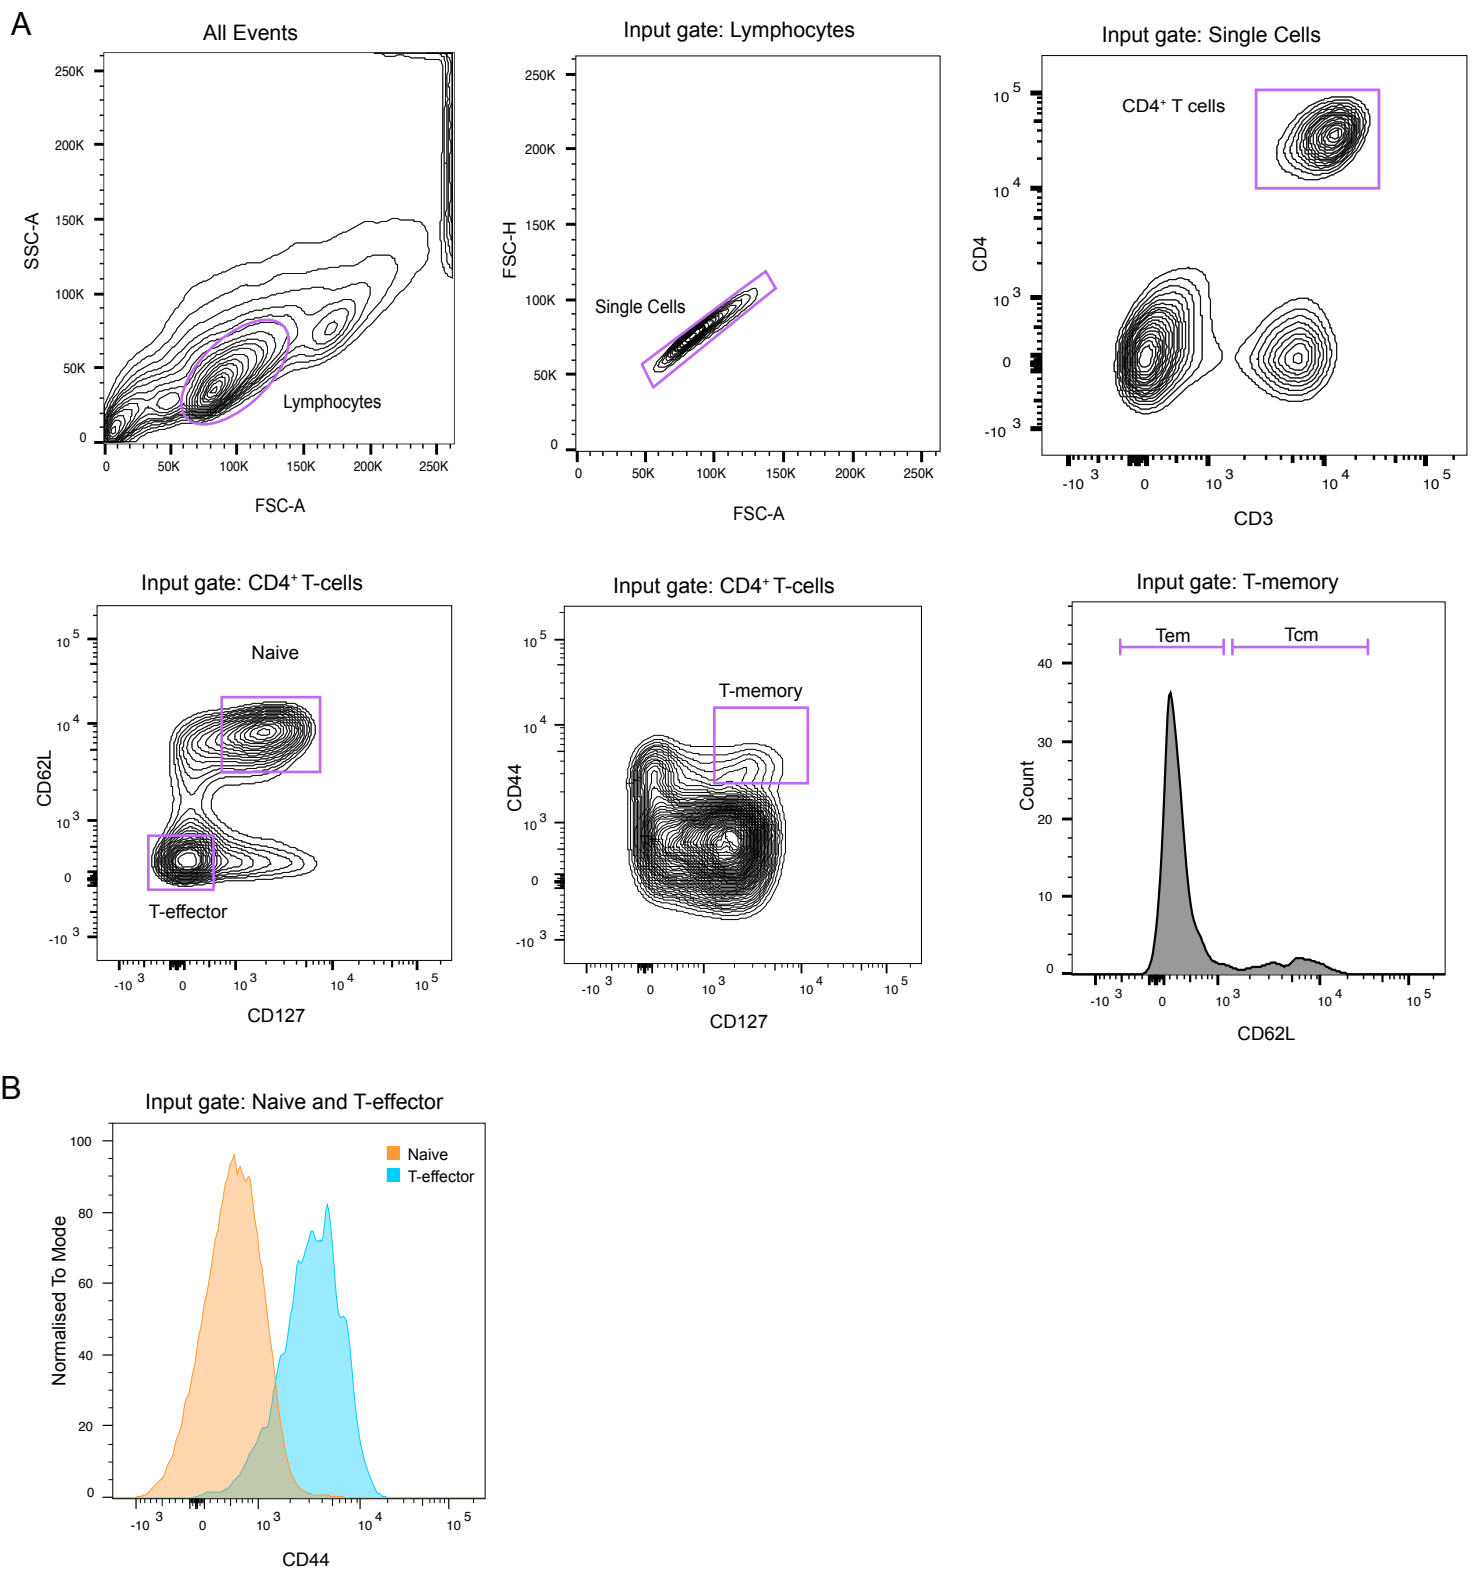

**Supplementary Figure 1:** A) Gating strategy for T-cell populations, illustrated from a representative mouse infected with SBP *P. chabaudi* (AS) at day 6 post-infection. B) Histogram showing CD44 level of Naive and T-effector T-cell populations.

## Supplementary Figure 2

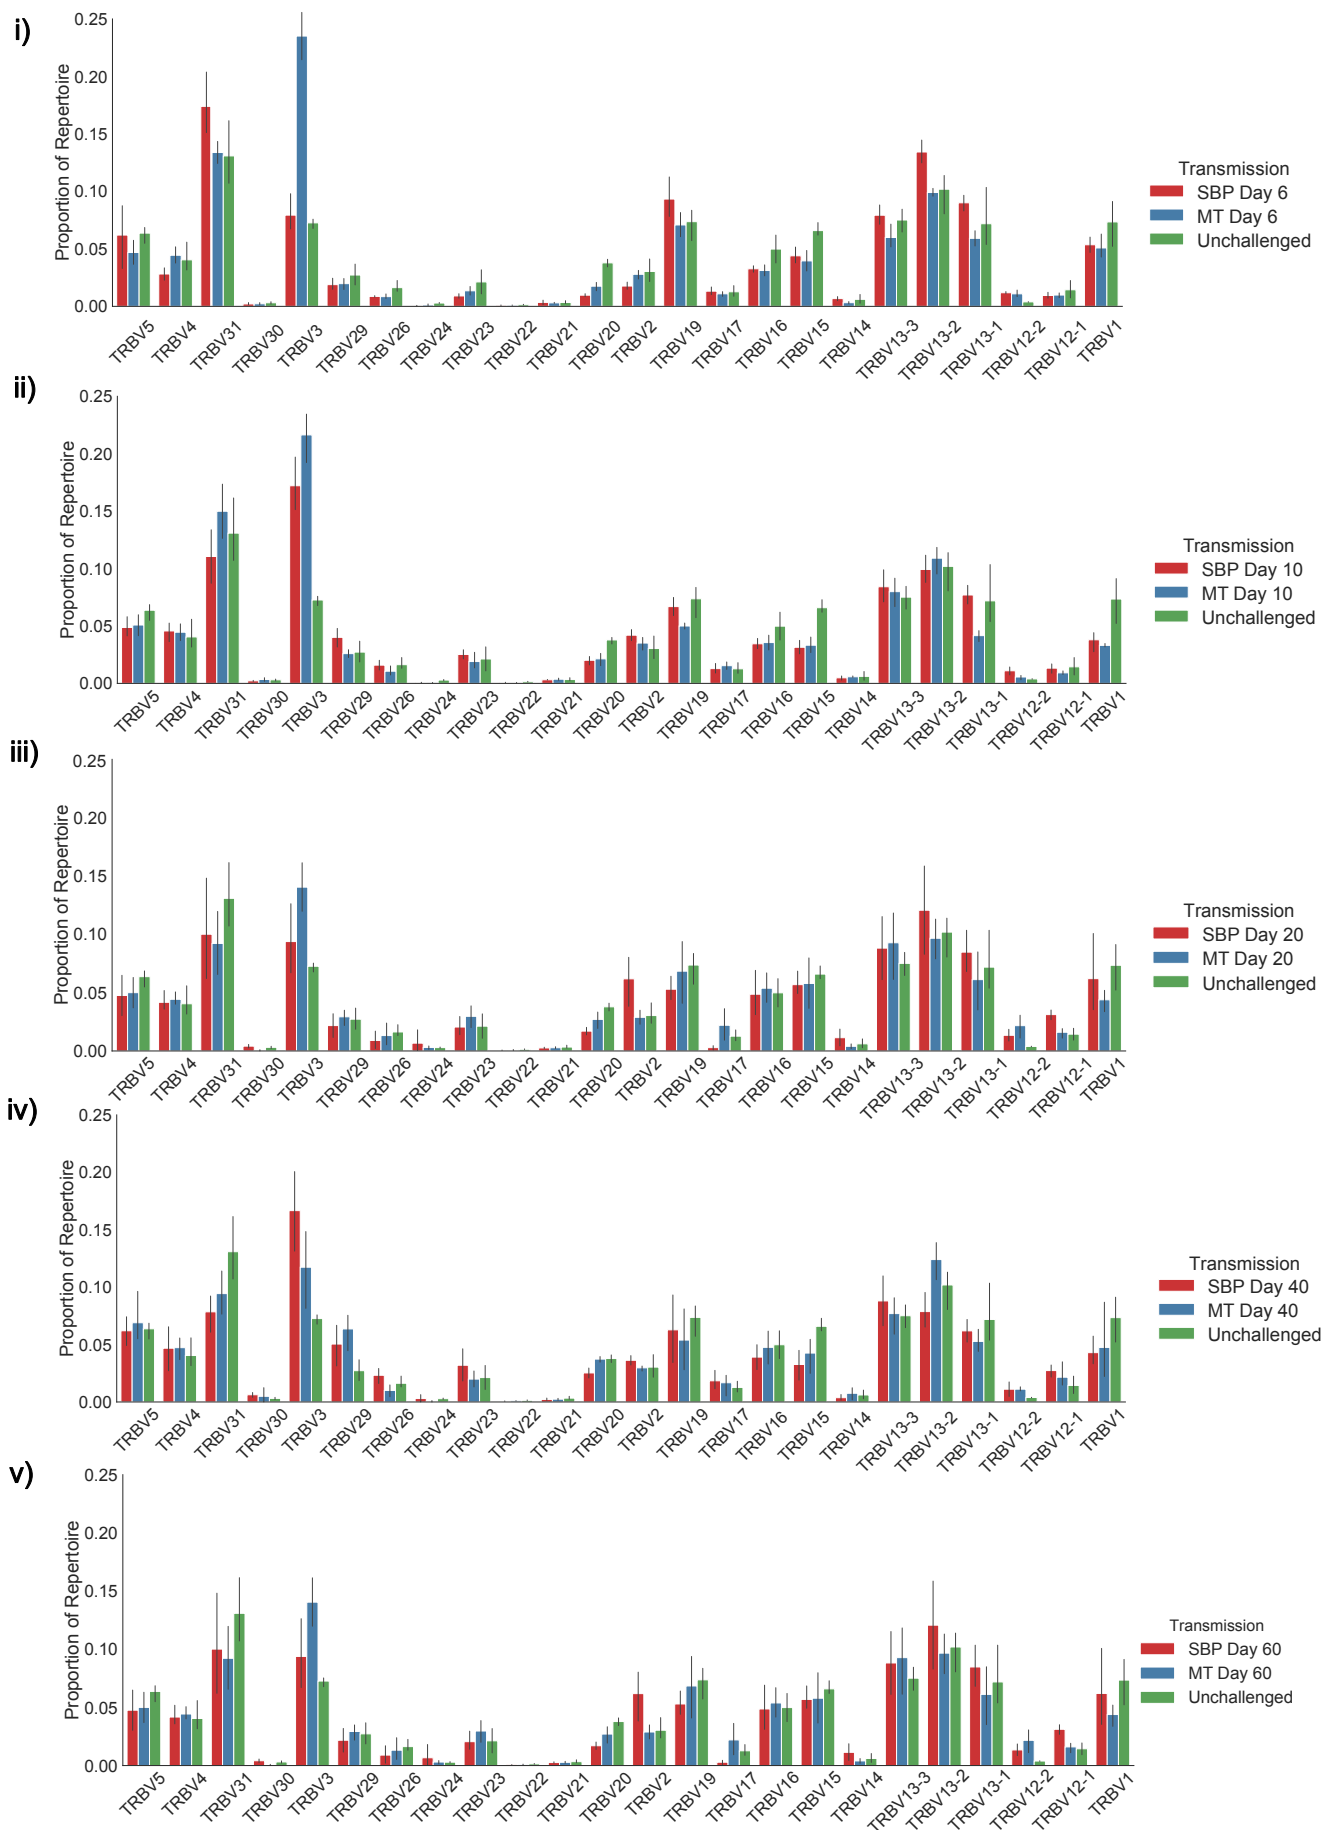

**Supplementary Figure 2:** Proportion of TRBV-gene usage in unchallenged  $T_N$  repertoires (green), and  $T_E$  repertoires of mice infected with SBP parasites (red) or recently MT parasites (blue) at days 6 (i), 10 (ii), 20 (iii), 40 (iv) and 60 (v) days post-infection.

### Supplementary Figure 3

i)

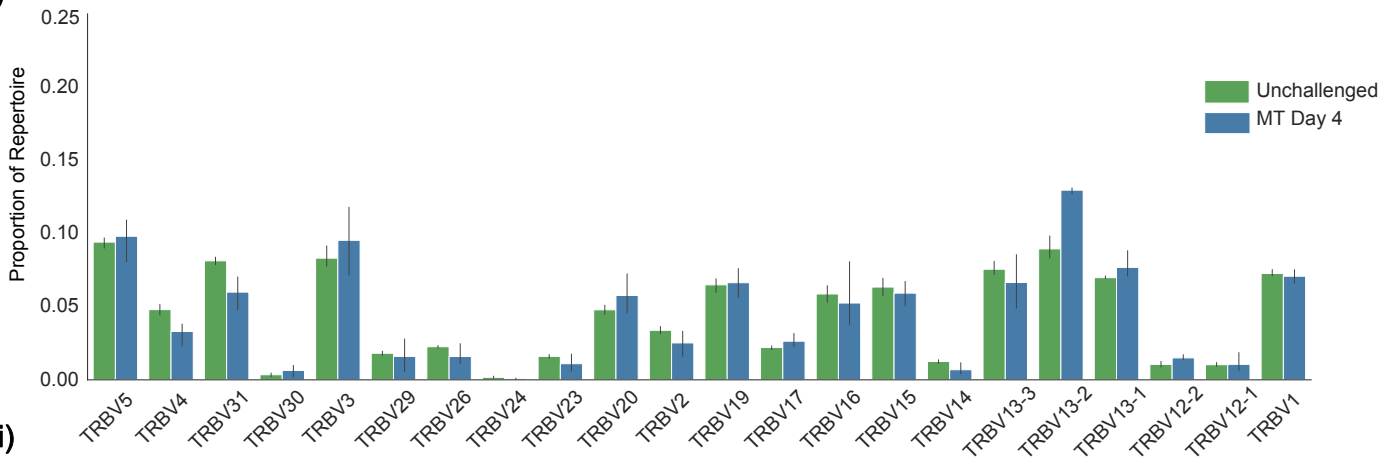

ii)

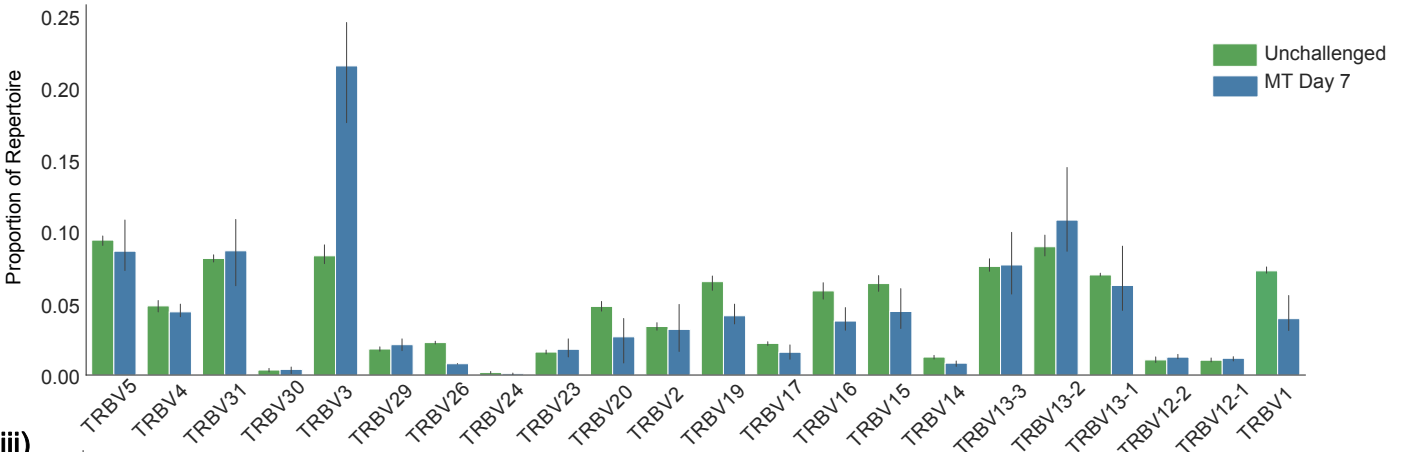

iii)

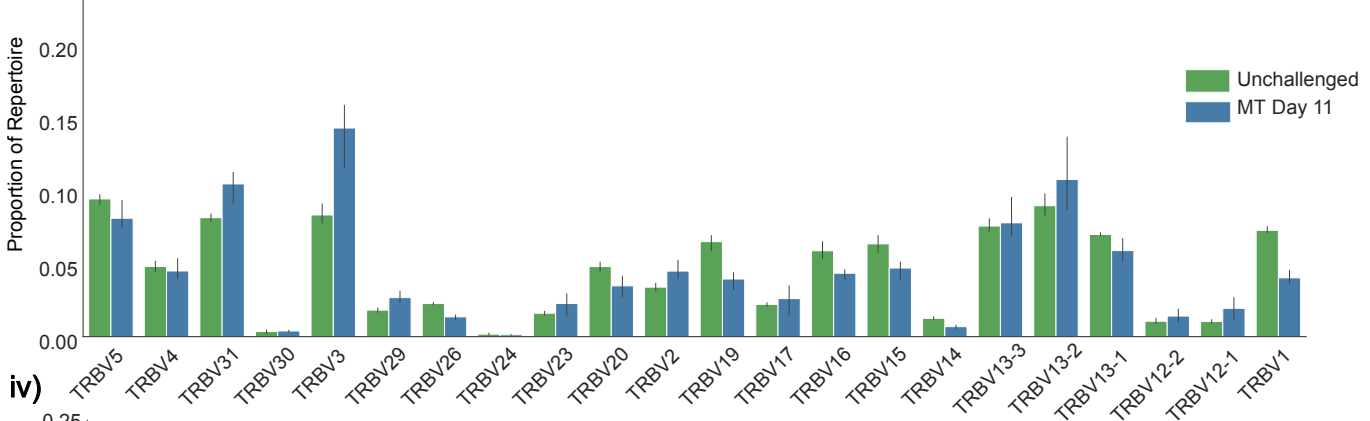

iv)

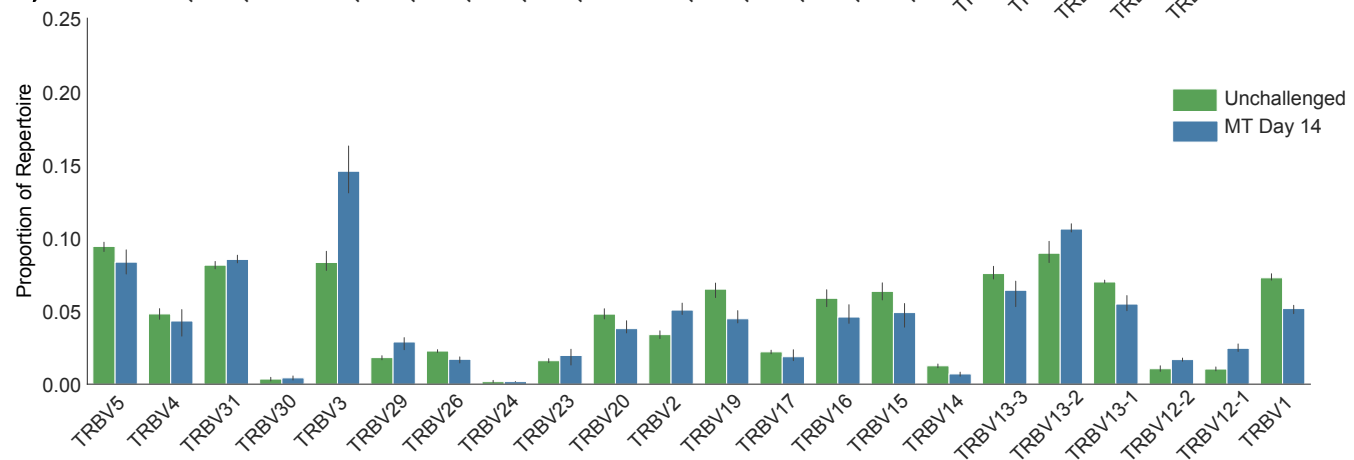

**Supplementary Figure 3:** Proportion of TRBV-gene usage in unchallenged  $T_N$  repertoires (green) and  $T_E$  repertoires of mice infected with recently MT parasites (blue) in a second independent experiment at days 4(i), 7 (ii), 11 (iii) and 14 (iv) post-infection.

## Supplementary Figure 4

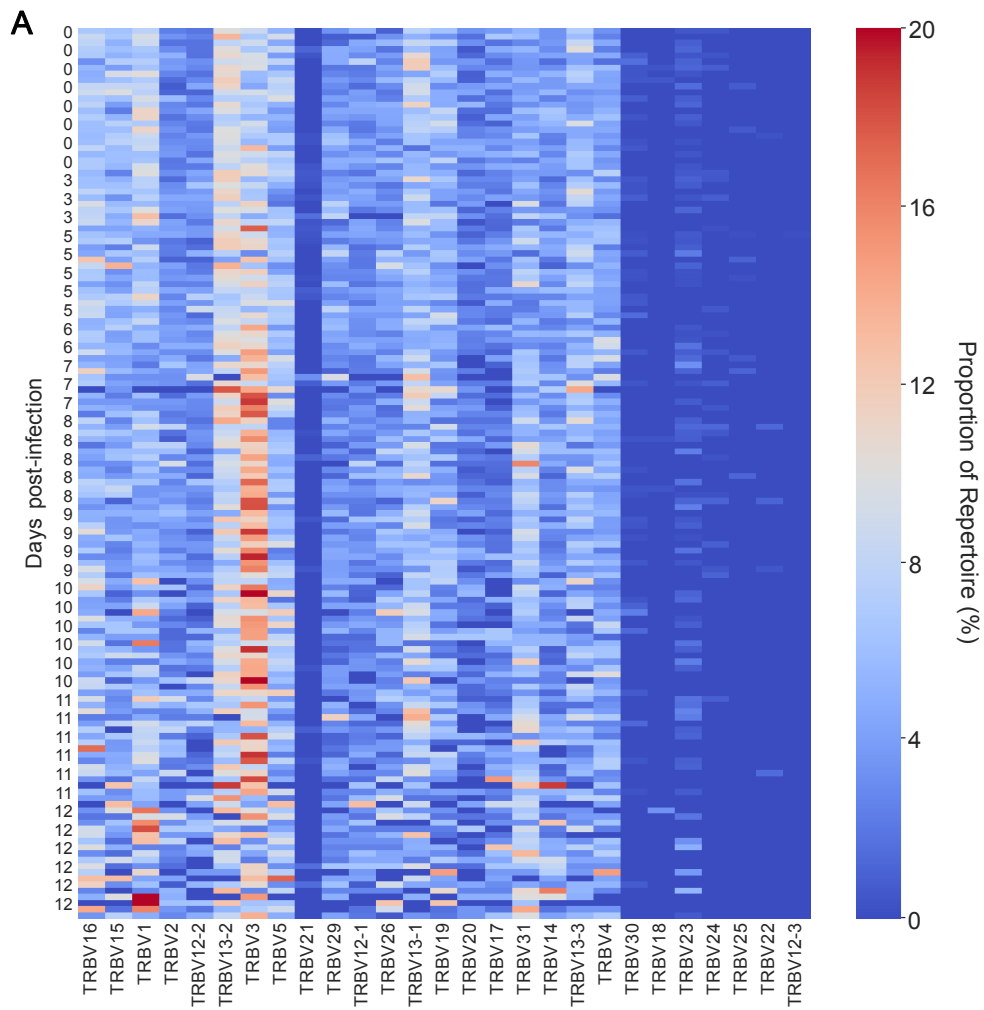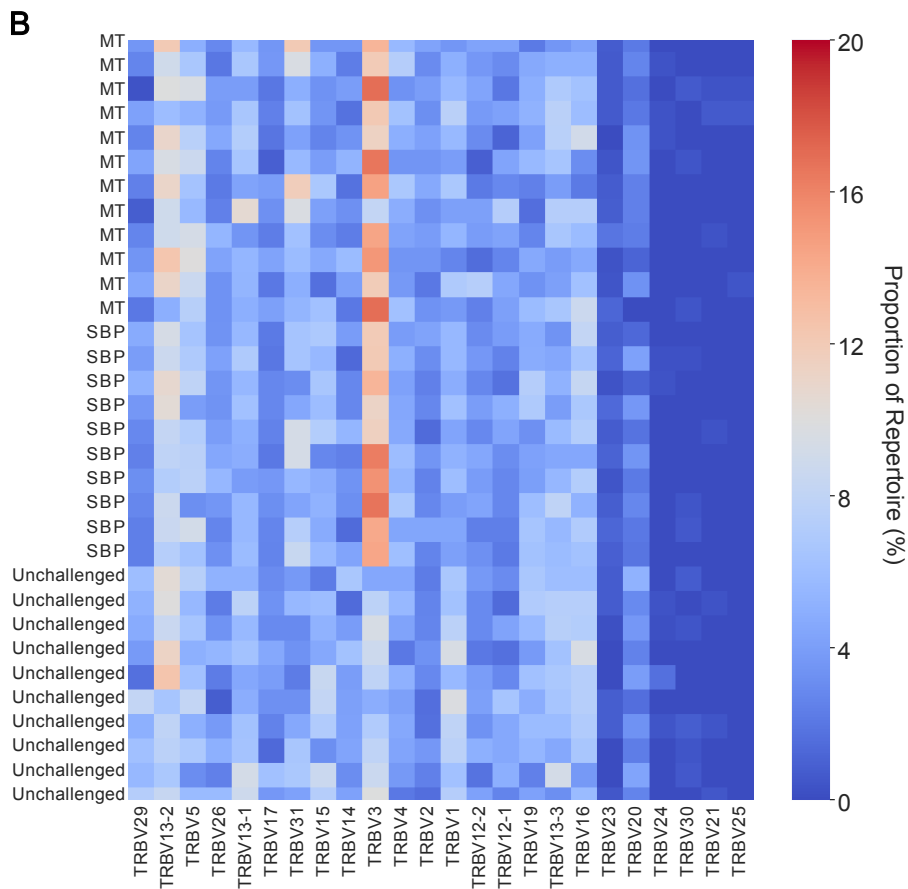

**Supplementary Figure 4:** Heatmaps show proportion of TRBV-gene usage in unchallenged and challenged mice unsorted splenic TCR $\beta$  repertoires from C57BL/6 mice infected with bloodstage A) *P. chabaudi* (AS) and B) *P. chabaudi* (CB). TCR $\beta$  repertoires were reconstructed from publicly available RNA-seq data sets. Each column represents a unique TRBV gene, and each row is an individual replicate mouse. No time-point data is available for (B).

# Supplementary Figure 5

A)

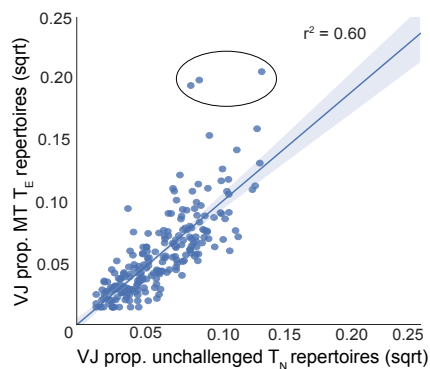

Bi)

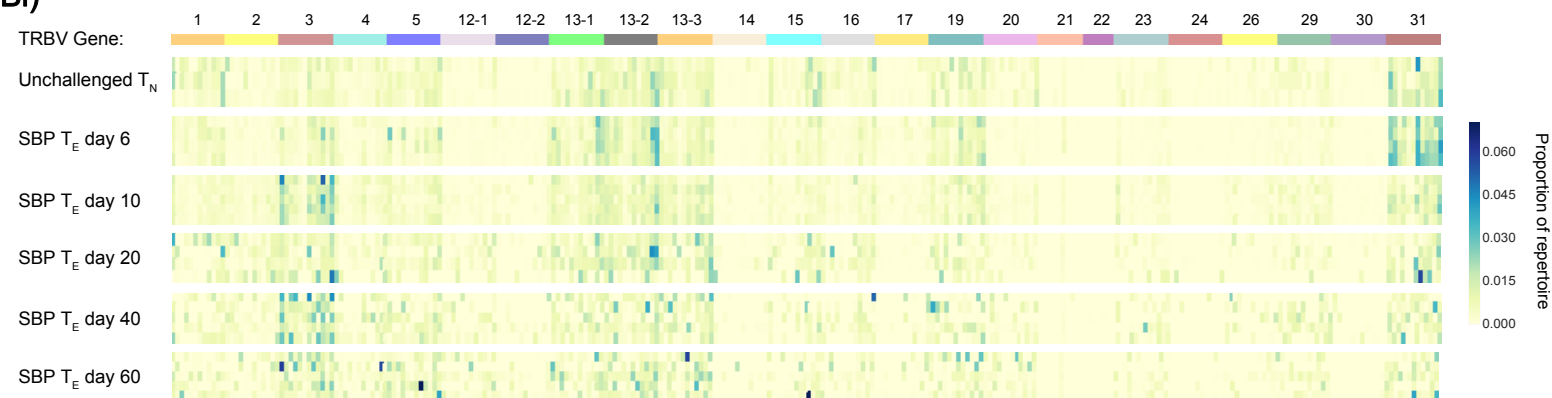

ii)

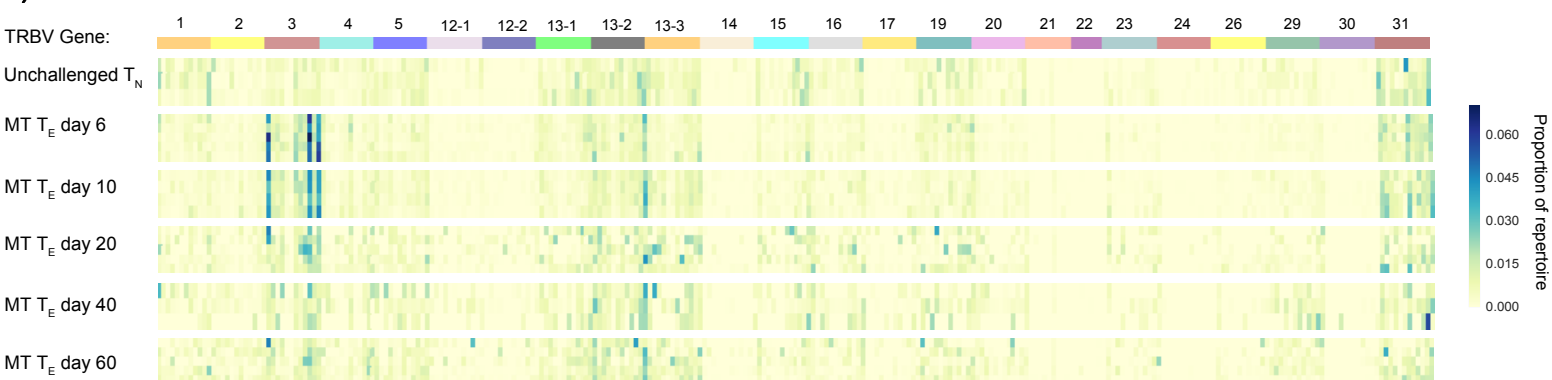

iii)

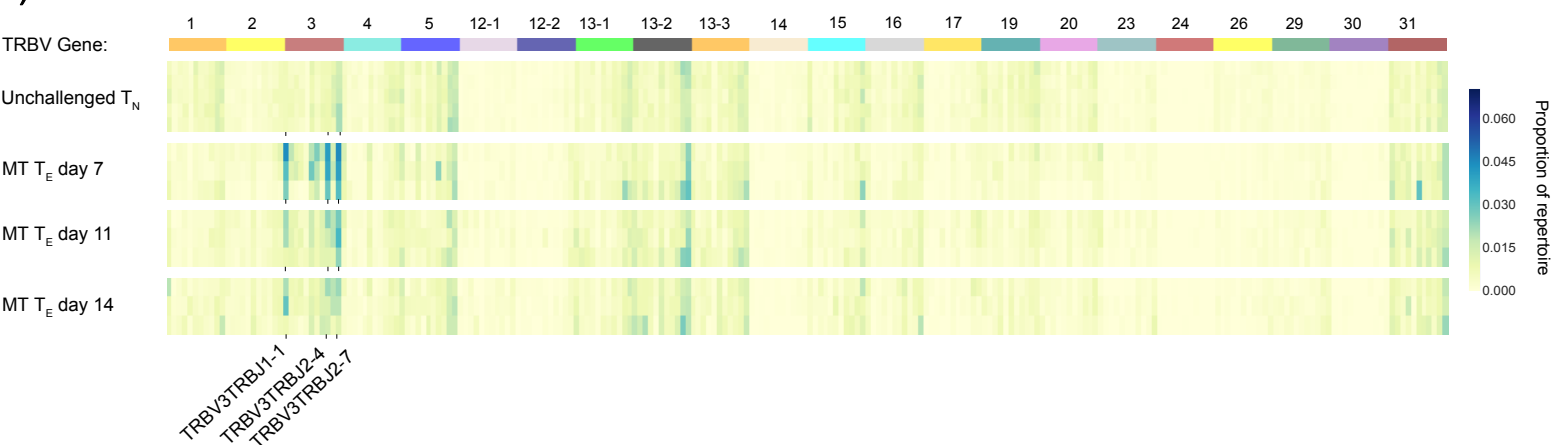

**Supplementary Figure 5:** Mean proportion of each V/J allelic combination in unchallenged T<sub>N</sub> repertoires versus challenged T<sub>E</sub> repertoires at days 7 (i) post-infection for mice infected with recently MT parasites in a second independent experiment. B) Heatmap depicts proportion of each V/J allelic combination (columns) for individual replicate mouse (rows) for (i) unchallenged T<sub>N</sub> repertoires and acute T<sub>E</sub> SBP repertoires and (ii) unchallenged T<sub>N</sub> repertoires and acute T<sub>E</sub> MT repertoires and (iii) unchallenged T<sub>N</sub> repertoires and acute T<sub>E</sub> MT repertoires from a second independent experiment.

## Supplementary Figure 6

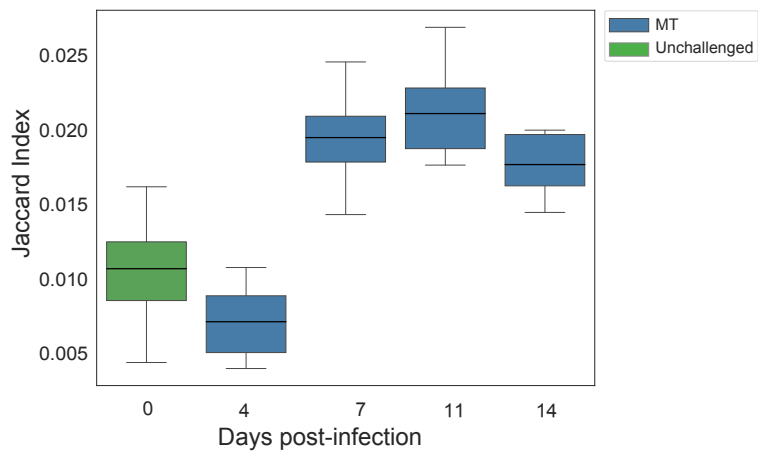

**Supplementary Figure 6:** Jaccard similarity index of unchallenged  $T_N$  repertoires (green) and  $T_E$  repertoires of mice infected with recently MT parasites (blue) in a second independent experiment at days 4, 7, 11 and 14 post-infection. Data was normalised by down-sampling to 5000 UMI.

## Supplementary Figure 7

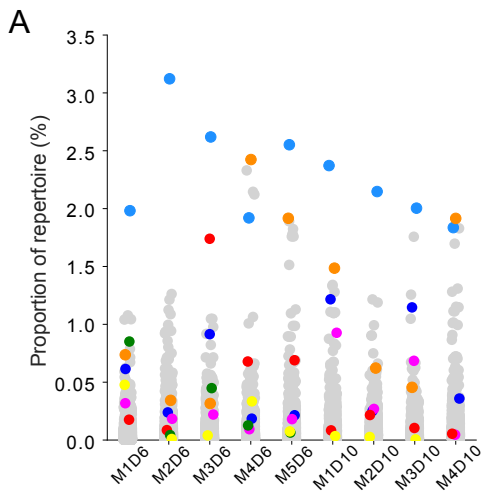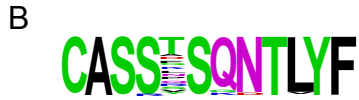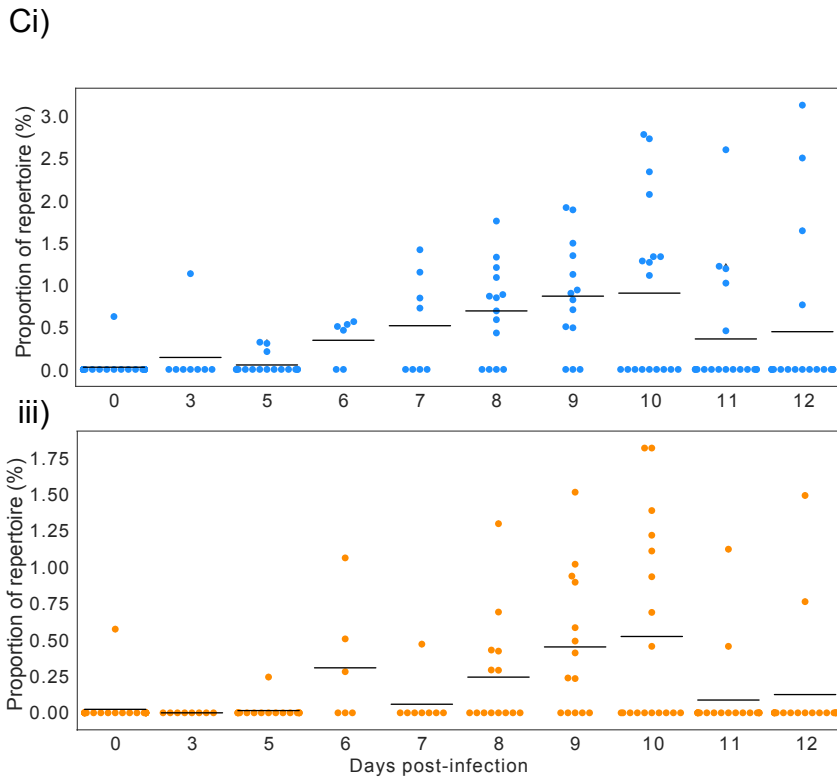

**Supplementary Figure 7:** Strip plots indicate proportion of individual repertoires taken up by clusters identified as significantly enriched using GLIPH2 (results in Supplementary Table 1), with representative sequence logos for each cluster. B) Representative amino acid sequence logo of the most dominant cluster detected (OTU1) from a second independent experiment. C) Proportion of CDR3s in cluster OTU1 (blue) and OTU2 (orange) found in unsorted splenic TCR $\beta$  repertoires reconstructed from publicly available RNA-seq data for i) and iii) *P. chabaudi* (AS), and for ii) and iv) *P. chabaudi* (CB). No time point data is available for the *P. chabaudi* (CB) dataset. Black horizontal line indicates mean, and each point represents an individual mouse.

## Supplementary Figure 8

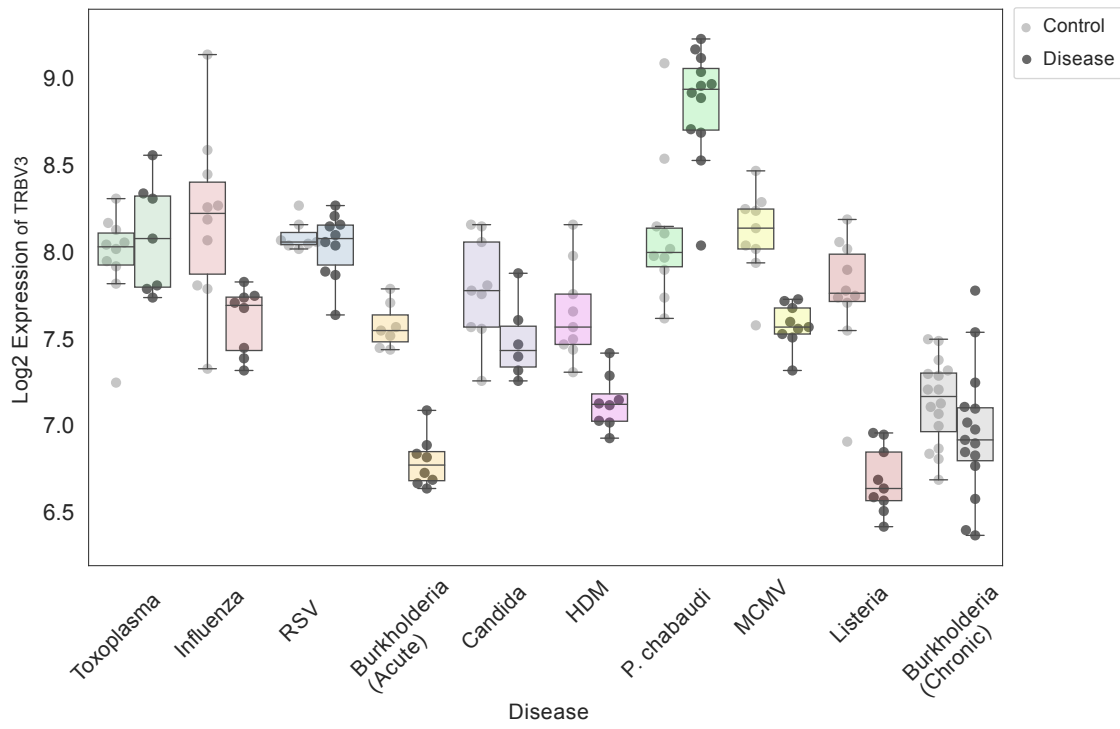

**Supplementary Figure 8:** Log<sub>2</sub> expression values (normalised RNA-seq counts) of TRBV3 from publicly available whole blood RNA-seq data from C57Bl/6 mice, taken at peak of murine response for each disease. Data is paired as unchallenged controls (light grey circles) and challenged (black circles).



**Supplementary Table 1:** Summary results for GLIPH2 analysis. Filter criteria used: CDR3 sequence present in at least 75% of replicate group; vb\_score<=0.05; length\_score <=0.05; expansion\_score <=0.05; Fisher\_score <=0.001

| Infection type | Time point | No. of clusters meeting criteria | Cluster_ID | Pattern    | Final_score |      |
|----------------|------------|----------------------------------|------------|------------|-------------|------|
| MT             | D6         | 5                                | 14         | S%SQNT     | 8.50E-14    | OTU1 |
|                |            |                                  | 18         | SPT%NTE    | 3.10E-13    |      |
|                |            |                                  | 10         | SLS%NTE    | 4.60E-13    |      |
|                |            |                                  | 4          | SLTQ       | 4.60E-12    |      |
|                |            |                                  | 7          | SL%QGAE    | 8.50E-12    |      |
| MT             | D10        | 4                                | 21         | S%SQNT     | 7.70E-14    | OTU1 |
|                |            |                                  | 32         | S%GQYE     | 4.40E-13    | OTU2 |
|                |            |                                  | 5          | SLS%NTE    | 1.70E-12    |      |
|                |            |                                  | 23         | SL%QNTE    | 6.10E-12    |      |
| MT             | D20        | 0                                |            |            |             |      |
| MT             | D40        | 0                                |            |            |             |      |
| MT             | D60        | 0                                |            |            |             |      |
| SBP            | D6         | 0                                |            |            |             |      |
| SBP            | D10        | 1                                | 16         | S%GT TSAET | 1.10E-09    |      |
| SBP            | D20        | 0                                |            |            |             |      |
| SBP            | D40        | 0                                |            |            |             |      |
| SBP            | D60        | 0                                |            |            |             |      |
