# Supplementary material for: A Conserved TCRβ Signature Dominates a Highly Polyclonal T-Cell Expansion During the Acute Phase of a Murine Malaria Infection
Source: PubMed Central journal article supplement (PMC7719809; doi:10.3389/fimmu.2020.587756), 2020-11-23
Supplement: Image_2.pdf [file Image_2.pdf]

# Supplementary Figure 9

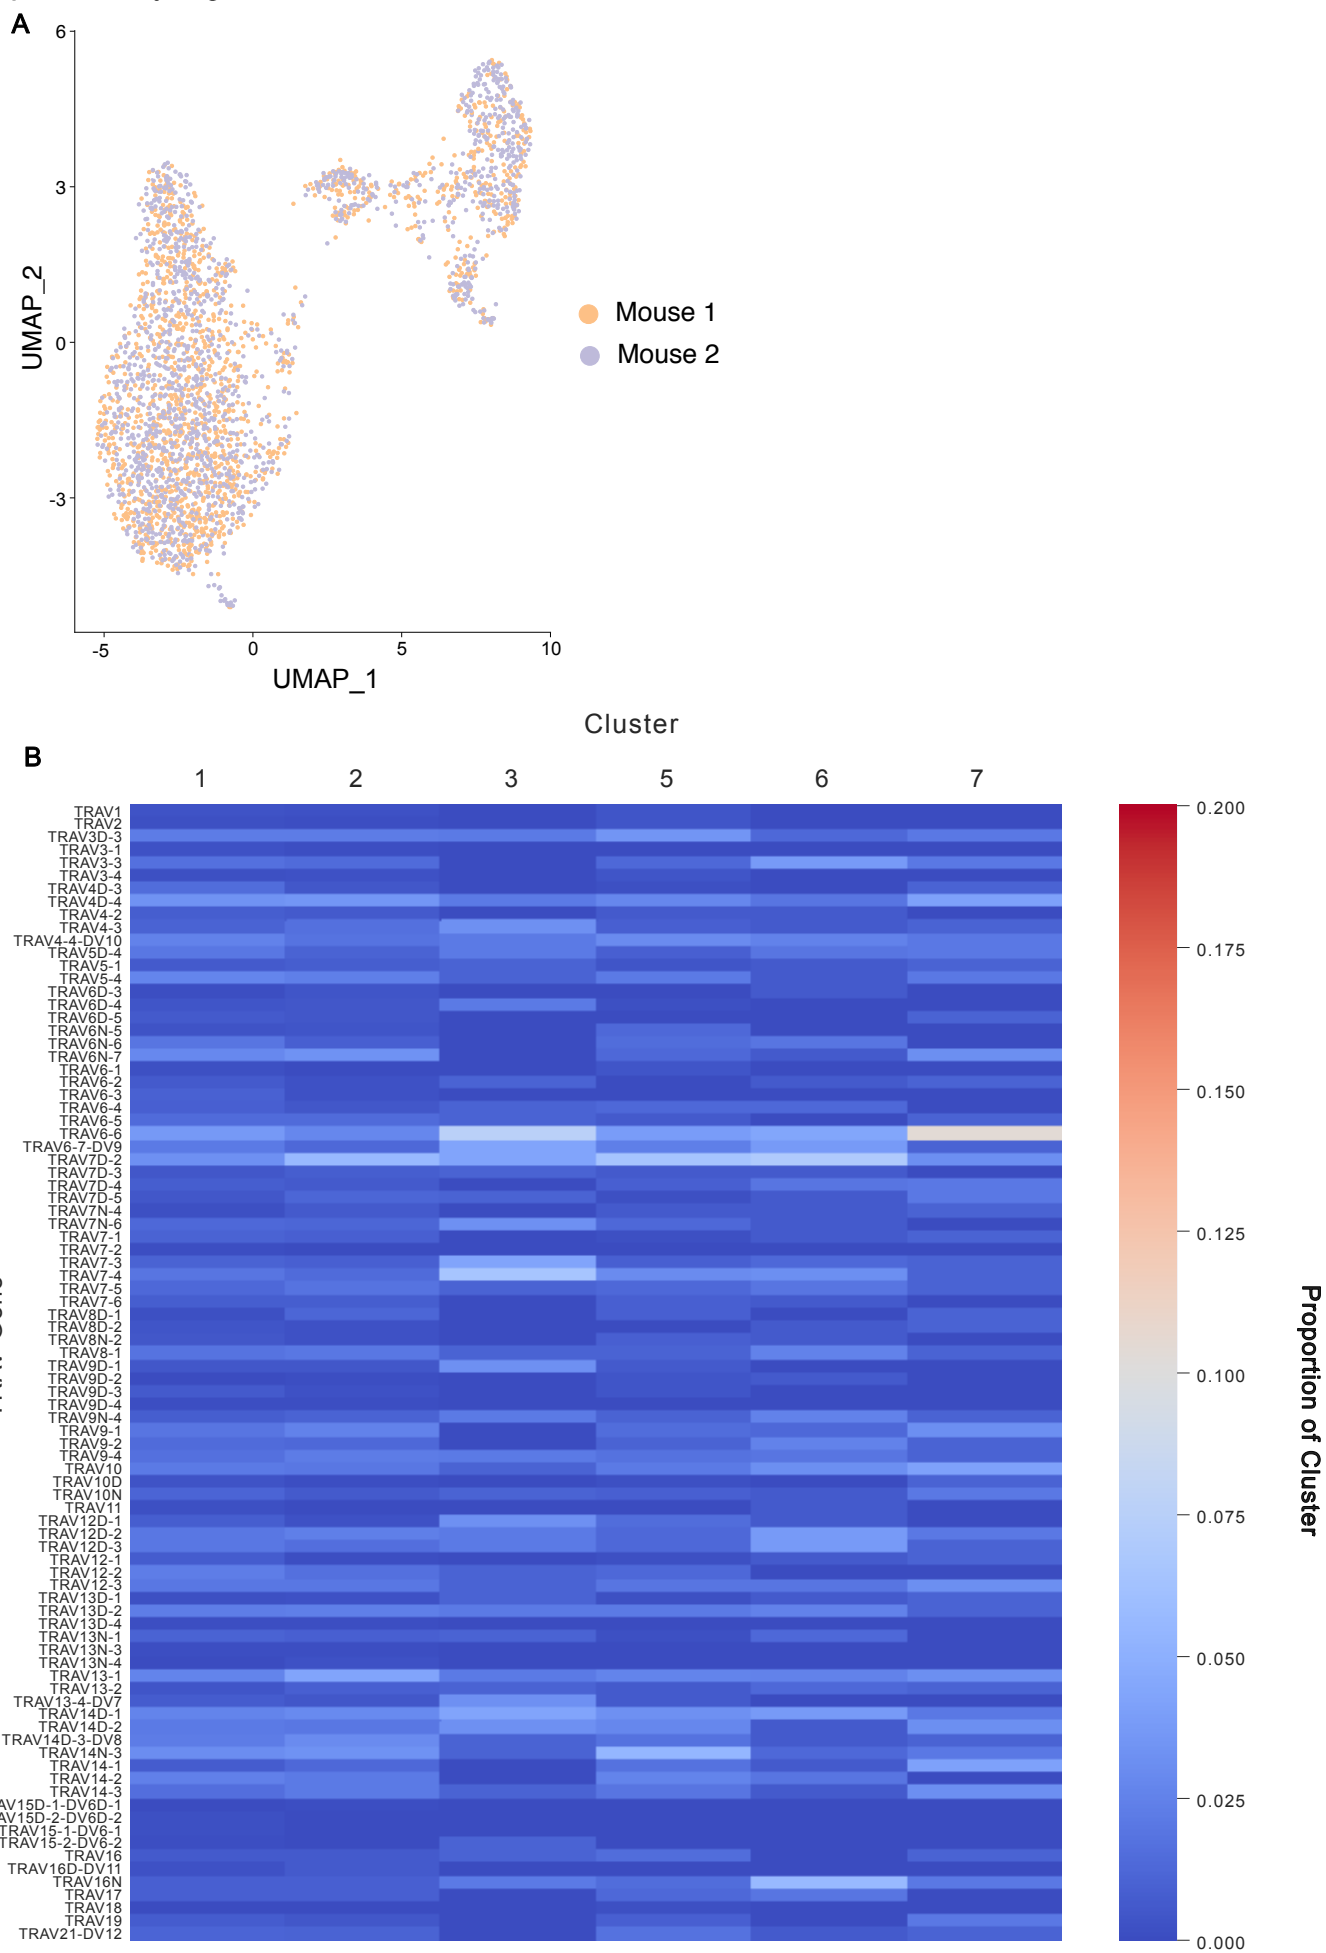

**Supplementary Figure 9:** A) Two-dimensional UMAP visualization of CD4<sup>+</sup> splenocytes from 2 challenged mice, at day 7 post-infection, as per Seurat cluster assignment, with cells coloured by individual; cell positions are as per UMAP in Figure 8A. B) Heatmap displays proportion of TRAV gene per cluster TCR repertoire.

## Supplementary Figure 10

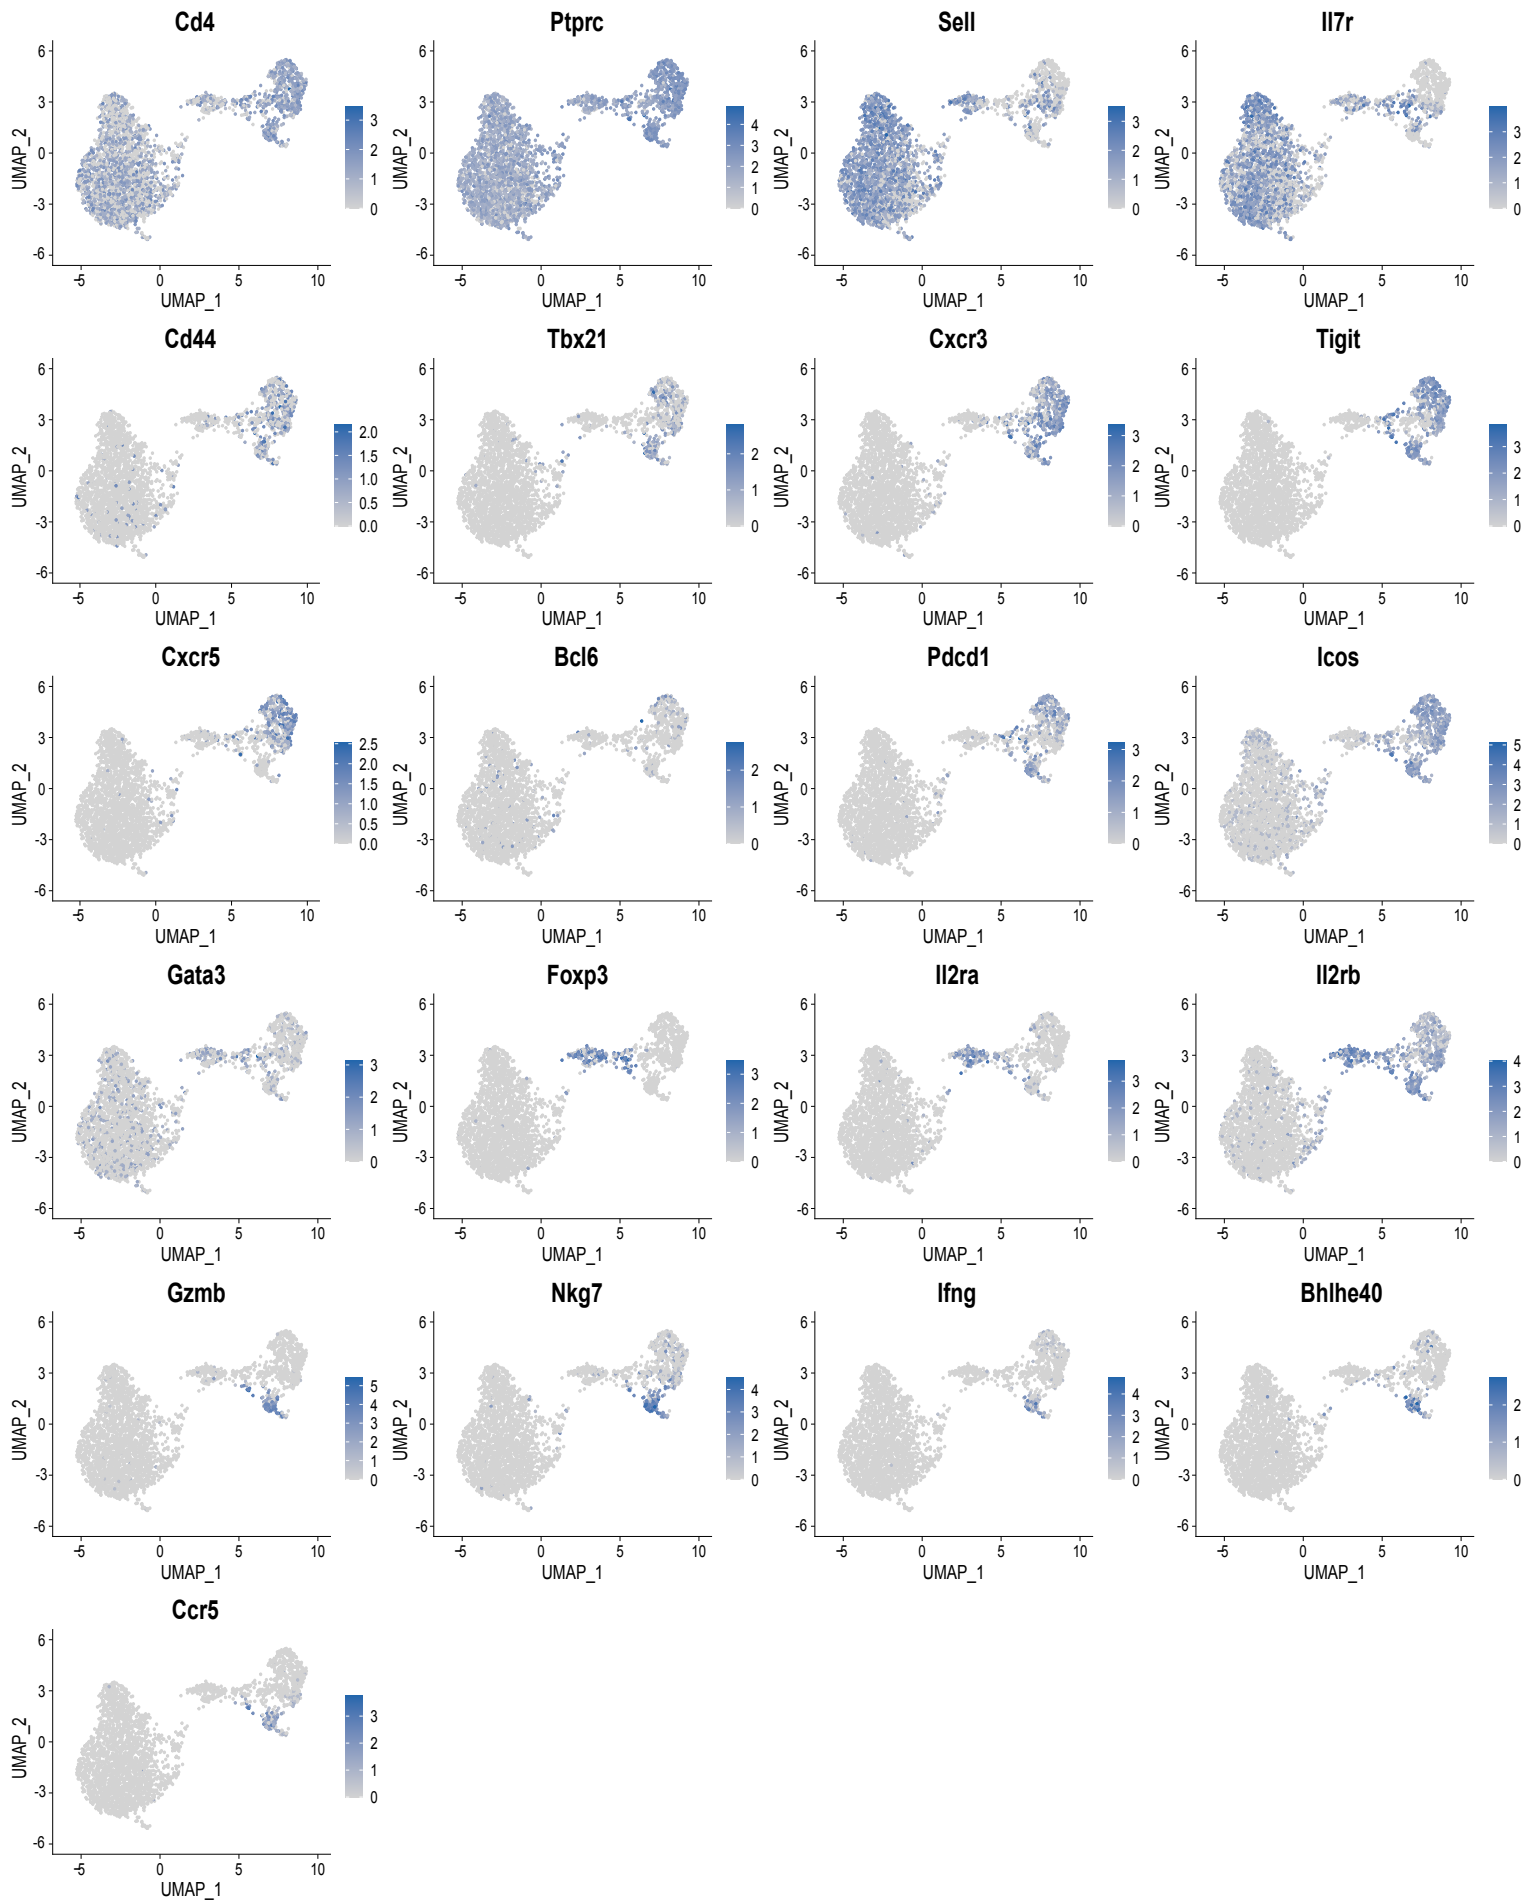

**Supplementary Figure 10:** Expression of T-cell marker genes of interest, from CD4<sup>+</sup> splenocytes of 2 challenged mice at day 7 post *P. chabaudi* infection; cell positions are as per UMAP in Figure 8A.

# Supplementary Figure 11

1

2

3

4

5

6

7

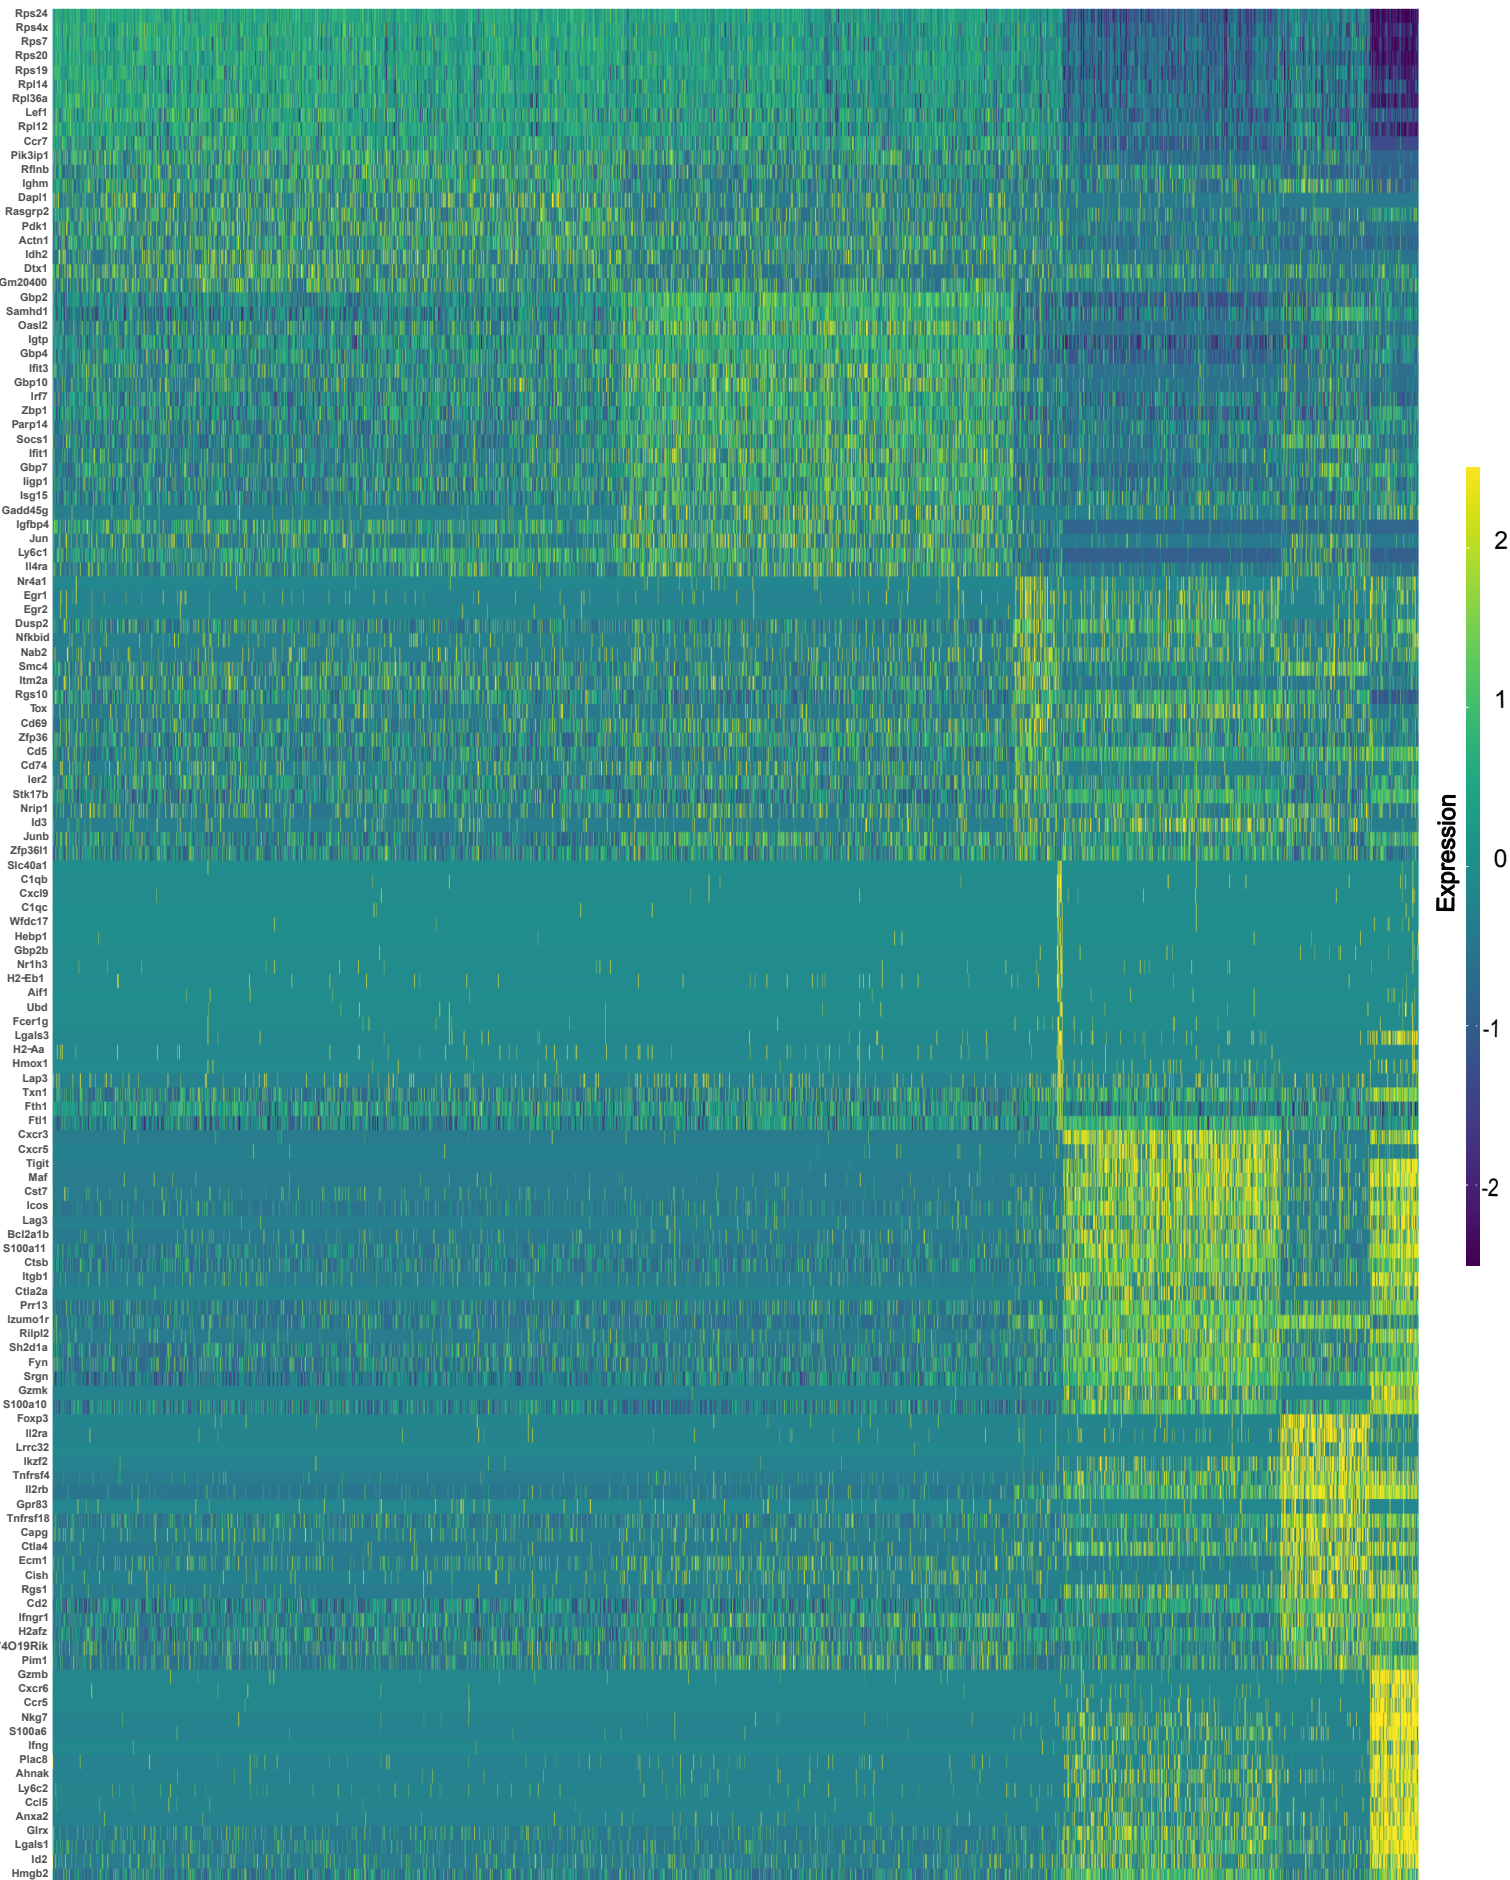

**Supplementary Figure 11: D)** Heatmap depicts the top 20 differentially expressed genes and their expression values between all 7 distinct clusters, of CD4<sup>+</sup> splenocytes of 2 challenged mice at day 7 post *P. chabaudi* infection.

## Supplementary Figure 12

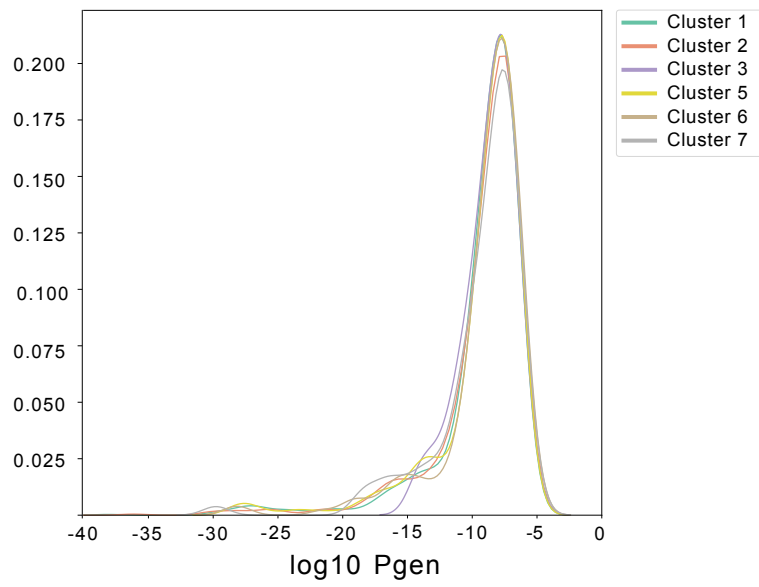

**Supplementary Figure 12:** KDE plot of the probability of generation ( $\log_{10}$ ) of TCR $\beta$  CDR3 nucleotide sequences per cluster, of CD4<sup>+</sup> splenocytes of 2 challenged mice at day 7 post *P. chabaudi* infection.
